# Supplementary material for: Association between iron accumulation in the dorsal striatum and compulsive drinking in alcohol use disorder
Source: PubMed Central journal article supplement (PMC9879829; doi:10.1007/s00213-022-06301-7), 2022-12-29
Supplement: 213_2022_6301_MOESM1_ESM.pdf [file 213_2022_6301_MOESM1_ESM.pdf]

Supplementary Material

| Study name                       | Inclusion criterion *                                                                                                                                               | Sample size |    | ClinicalTrials/<br>German Clinical<br>Trials Register<br>(DRKS) |
|----------------------------------|---------------------------------------------------------------------------------------------------------------------------------------------------------------------|-------------|----|-----------------------------------------------------------------|
|                                  |                                                                                                                                                                     | AUD         | HC |                                                                 |
| Transalc<br>[22]                 | 1) Alcohol Use Disorder according to DSM-5;<br>2) for heavy-drinker, at least 84g pure alcohol<br>in the previous 90 day;<br>3) treatment-seeking and abstinent.    | 33          | 37 | DRKS:<br>DRKS00003357                                           |
| SFB_Folges<br>tudie [23]         | 1) alcohol dependence according to the DSM-<br>IV and ICD 10;<br>3) treatment-seeking and abstinent.                                                                | 82          | 53 | DRKS:<br>DRKS00003388                                           |
| ADHS [24]                        | 1) Alcohol Use Disorder according to the<br>DSM-5;<br>2) treatment-seeking and abstinent.                                                                           | 21          | 20 | DRKS:<br>DRKS00004929                                           |
| eMEDs [25]                       | 1) alcohol dependence according to the DSM-<br>IV and ICD 10;<br>2) treatment-seeking and abstinent.                                                                | 30          | 58 | DRKS:<br>DRKS00003341                                           |
| NALCUE<br>[26]                   | 1) Alcohol Use Disorder according to the<br>DSM-5;<br>2) at least 60g for men and 40g for women<br>pure alcohol, at least 5 days/week;<br>3) non-treatment-seeking. | 20          | 1  | ClinicalTrials:<br>NCT02372318                                  |
| Oxytocin<br>[27]                 | healthy participants **                                                                                                                                             | 0           | 13 | DRKS:<br>DRKS00009253                                           |
| Avatar [28]                      | healthy participants                                                                                                                                                | 0           | 49 | DRKS:<br>DRKS00009439                                           |
| CBD-IS<br>(not yet<br>published) | healthy participants                                                                                                                                                | 0           | 43 | ClinicalTrials:<br>NCT02051387                                  |

---

Abbreviations: diagnostic and statistical manual of mental disorders (DSM), international classification of diseases (ICD), Alcohol Use Disorder (AUD), healthy control (HC).

\* General criterion of inclusion and exclusion:

These studies included AUD individuals who 1) between 18 and 75 years, 2) right-handed; and excluded AUD individuals who 1) comorbid axis-I disorders (other than nicotine dependence) in the last year, 2) treatment with psychotropic or anticonvulsive medications in the last three months, 3) severe neurological or physiological disease (i.e. liver cirrhosis), 4) positive drug screening, 5) ineligibility for MRI scanning (e.g. metal implants), 6) history of severe head trauma.

These studies included healthy participants/light to moderate drinkers who 1) were aged between 18 and 75 years, 2) right-handed, 3) had an average alcohol consumption below 14g pure alcohol; and excluded healthy participants who 1) comorbid axis-I disorders (other than nicotine dependence) in the last year, 2) treatment with psychotropic or anticonvulsive medications in the last three months, 3) severe neurological or physiological disease (i.e. liver cirrhosis), 4) positive drug screening, 5) ineligibility for MRI scanning (e.g. metal implants), 6) history of severe head trauma.[27]

\*\* light to moderate drinkers were classified as healthy participants.

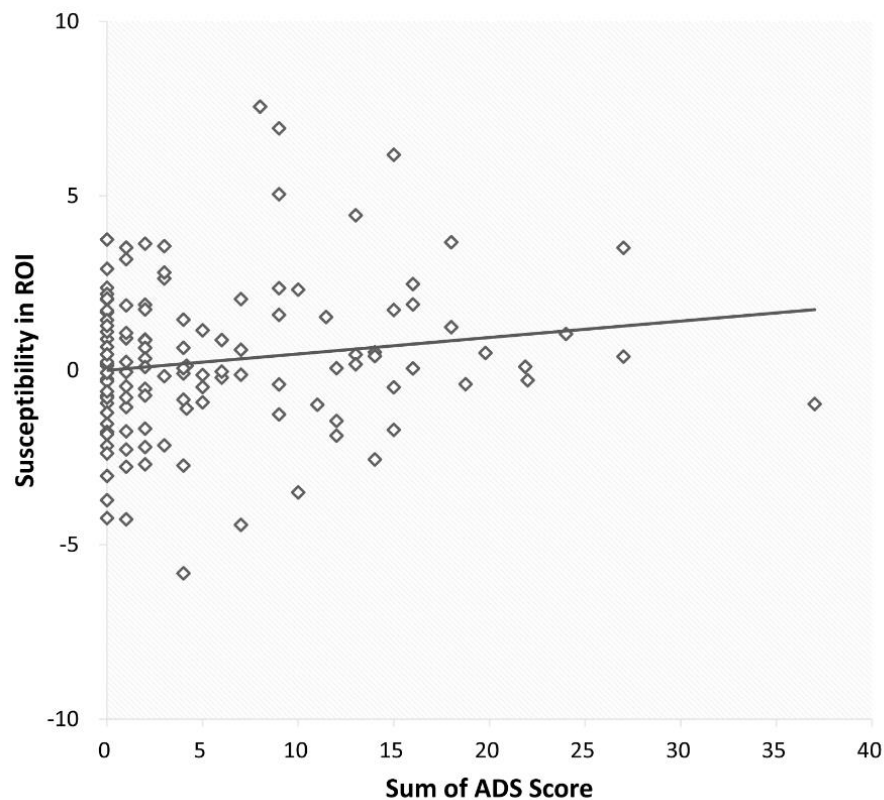

sFigure 1. Correlation of sum of ADS scores and susceptibility, controlling age and smoke-status

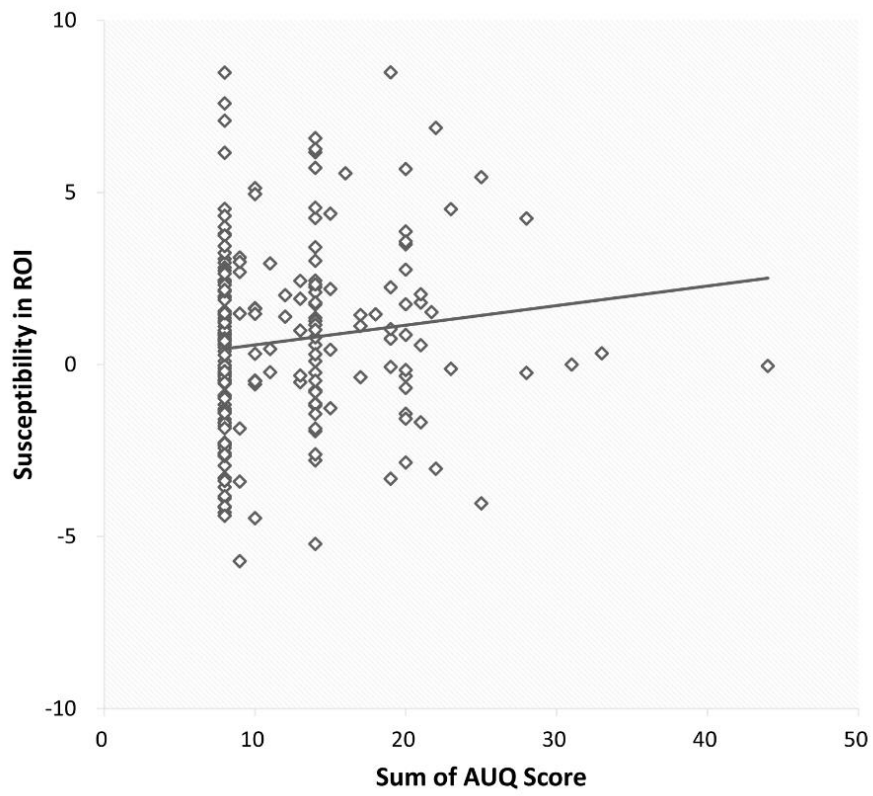

sFigure 2. Correlation of sum of AUQ scores and susceptibility, controlling age and smoke-status
